# Supplementary material for: A general strategy for the functionalization of two-dimensional metal chalcogenides
Source: Royal Society of Chemistry journal article supplement (doi:10.1039/c8nr03313g), 2018-01-01
Supplement: c8nr03313g1.pdf [file c8nr03313g1.pdf]

## Electronic Supplementary Information

### A General Strategy for the Functionalization of Two-dimensional Metal Dichalcogenides

Jianfeng Shen<sup>a</sup>, He Wang<sup>a</sup>, Peiyuan Zhuang<sup>a</sup>, Haotian Zeng<sup>b</sup>, Yuancai Ge<sup>a</sup>, Steven  
Craig<sup>c</sup>, Pei Dong<sup>c</sup>, Shang-Peng Gao<sup>b\*</sup>, Mingxin Ye<sup>a\*</sup>

<sup>a</sup>Institute of special materials and technology, Fudan University, 200433, Shanghai,  
China. E-mail: mxye@fudan.edu.cn

<sup>b</sup>Department of Materials Science, Fudan University, Shanghai 200433, China. E-mail:  
gaosp@fudan.edu.cn

<sup>c</sup>Department of Mechanical Engineering, George Mason University, Virginia, 22030,  
USA

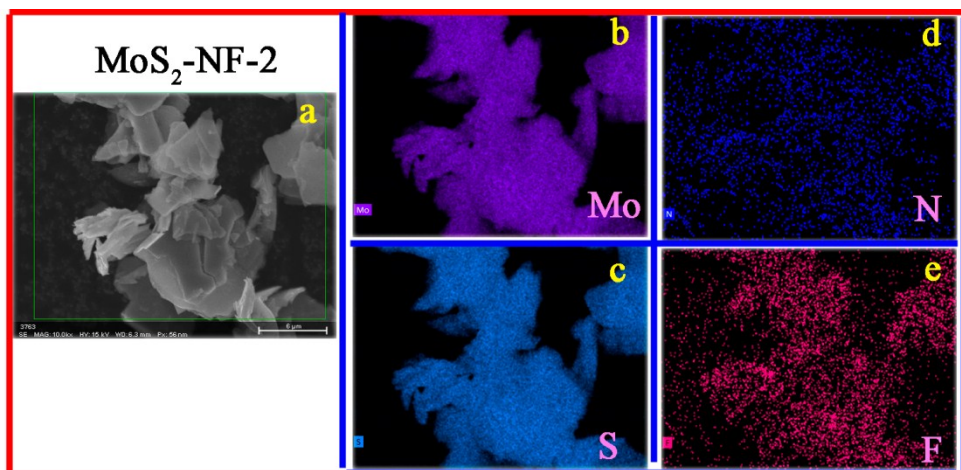

Figure S1 SEM (a) and EDX-Mapping (b-e) of MoS<sub>2</sub>-NF-2

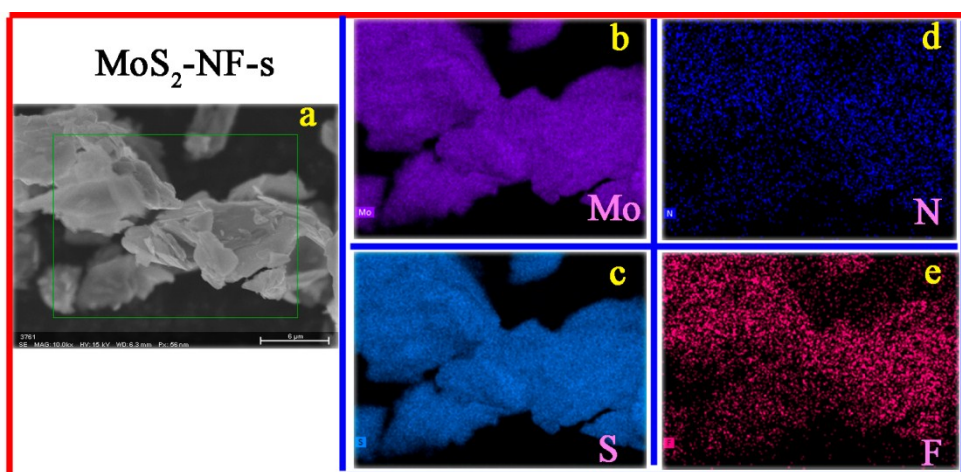

Figure S2 SEM (a) and EDX-Mapping (b-e) of MoS<sub>2</sub>-NF-s

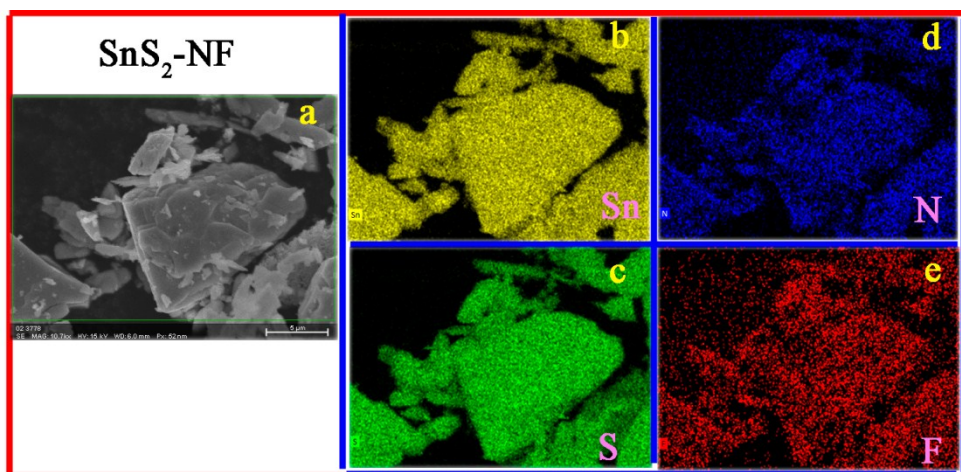

Figure S3 SEM (a) and EDX-Mapping (b-e) of SnS<sub>2</sub>-NF

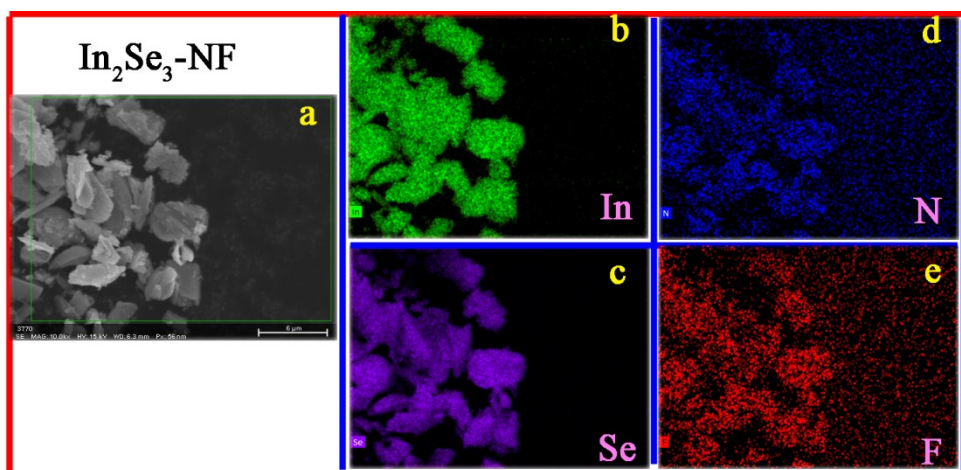

Figure S4 SEM (a) and EDX-Mapping (b-e) of  $\text{In}_2\text{Se}_3\text{-NF}$

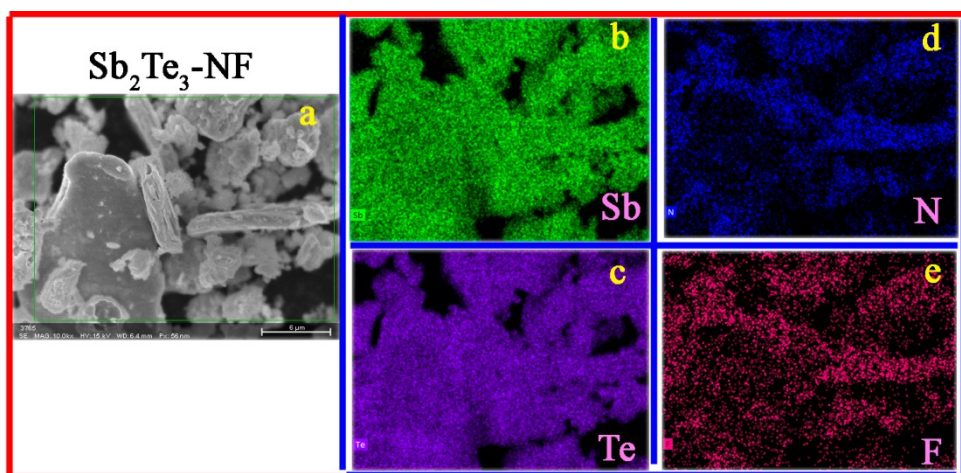

Figure S5 SEM (a) and EDX-Mapping (b-e) of  $\text{Sb}_2\text{Te}_3\text{-NF}$

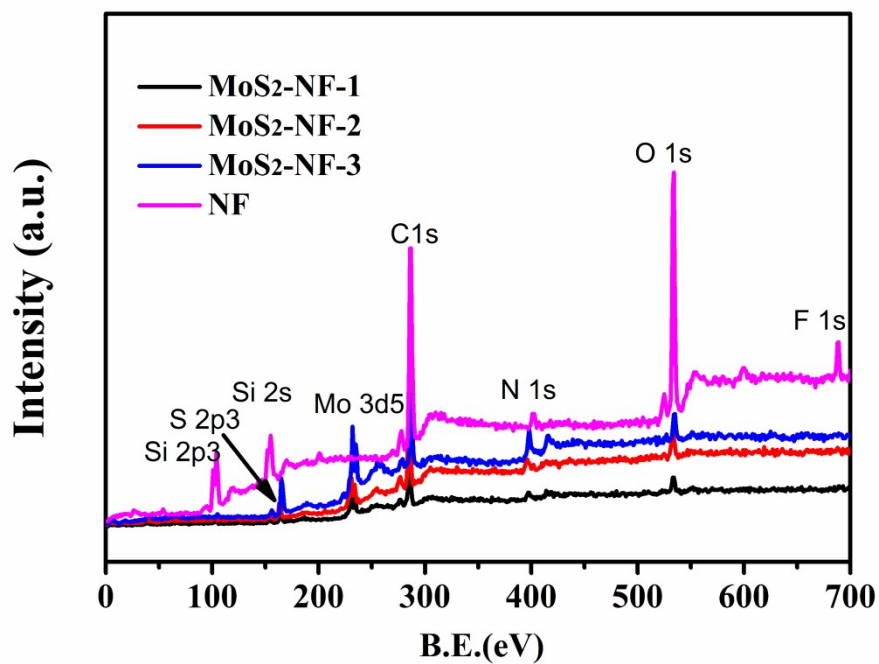

Figure S6 XPS survey spectra of MoS<sub>2</sub>-NFs and NF

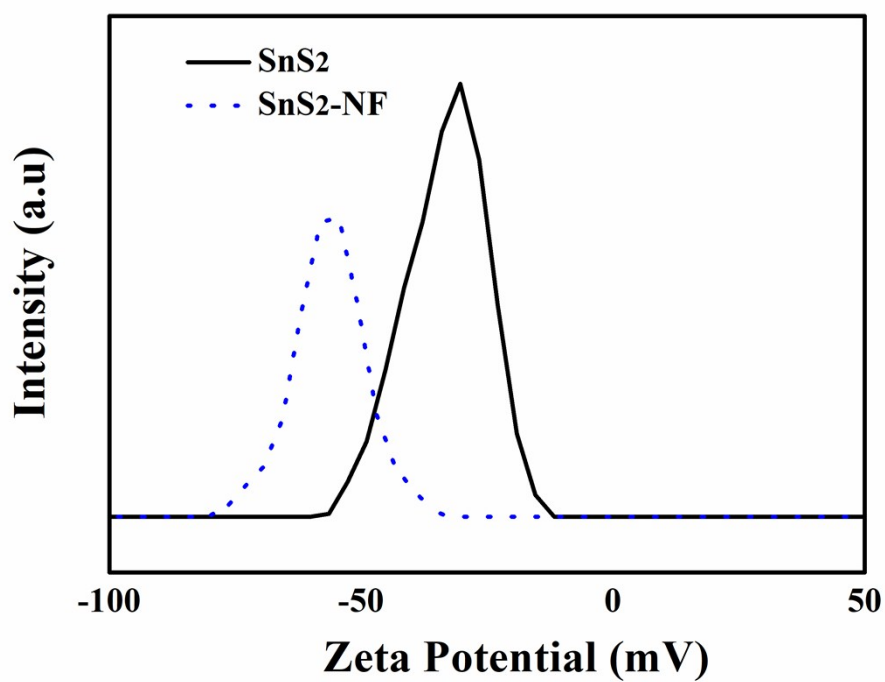

Figure S7 Zeta potential of pristine and functionalized SnS<sub>2</sub> nanosheets

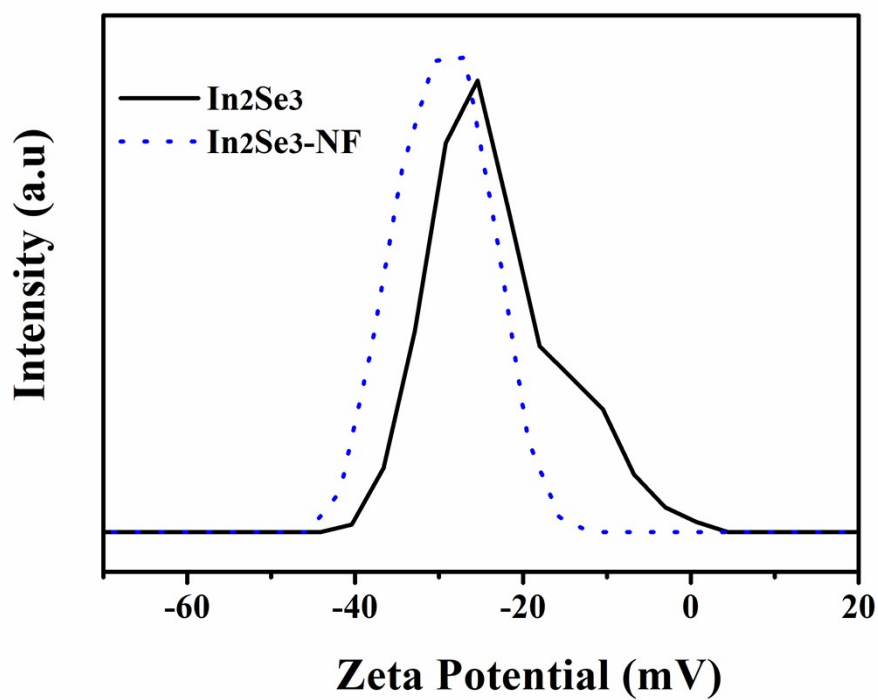

Figure S8 Zeta potential of pristine and functionalized In<sub>2</sub>Se<sub>3</sub> nanosheets

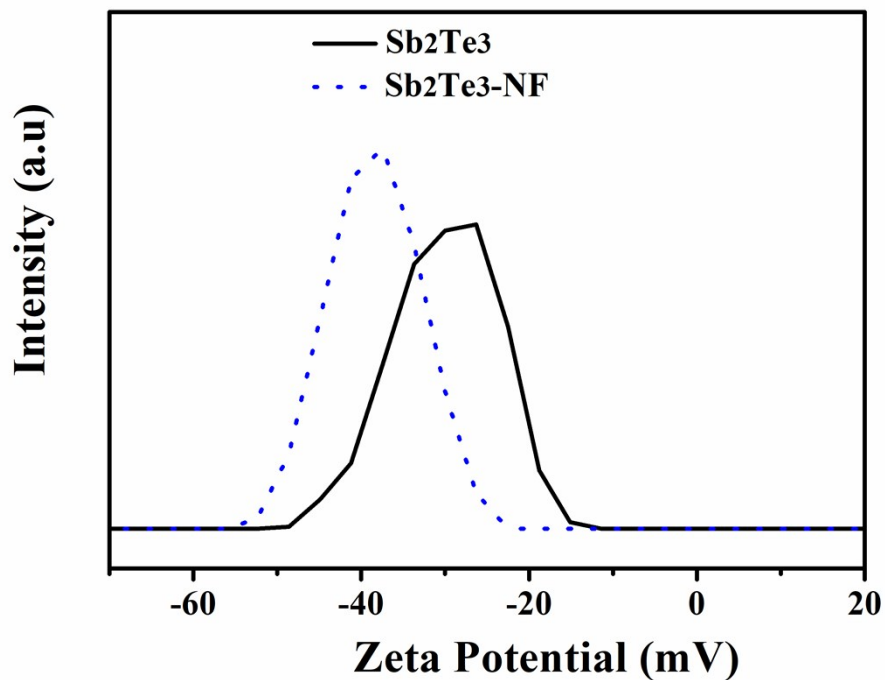

Figure S9 Zeta potential of pristine and functionalized Sb<sub>2</sub>Te<sub>3</sub> nanosheets

Table S1 Summary of the position and FWHM of  $E_{2G}^1$  and  $A_{1G}$  of original and functionalized  $MoS_2$ .

|               | Peak position ( $cm^{-1}$ ) |          | FWHM ( $cm^{-1}$ ) |          |
|---------------|-----------------------------|----------|--------------------|----------|
|               | $E_{2G}^1$                  | $A_{1G}$ | $E_{2G}^1$         | $A_{1G}$ |
| $MoS_2$       | 379.2                       | 404.3    | 9.2                | 9.4      |
| $MoS_2$ -NF-1 | 376.6                       | 403.4    | 9.8                | 10.1     |
| $MoS_2$ -NF-2 | 376.1                       | 402.9    | 10.2               | 10.5     |
| $MoS_2$ -NF-3 | 375.2                       | 402.3    | 11.1               | 10.7     |
